# Supplementary material for: Assembly and structure of Lys33-linked polyubiquitin reveals distinct conformations
Source: PubMed Central journal article supplement (PMC4390085; doi:10.1042/bj20141502), 2015-04-02

# **Assembly and structure of Lys<sup>33</sup>-linked polyubiquitin reveals distinct conformations**

## Supplementary Materials

Yosua Adi Kristariyanto, Soo-Youn Choi, Syed Arif Abdul Rehman, Maria Stella Ritorto, David G Campbell, Nicholas A Morrice\*, Rachel Toth & Yogesh Kulathu<sup>1</sup>

MRC Protein Phosphorylation and Ubiquitylation Unit, College of Life Sciences, University of Dundee, Dow Street, Dundee DD1 5EH, UK

\*Present address: AB Sciex UK Limited, Warrington, Cheshire WA1 1RX, UK

<sup>1</sup>Correspondence should be addressed to Yogesh Kulathu, MRC Protein Phosphorylation and Ubiquitylation Unit, College of Life Sciences, University of Dundee, Dow Street, Dundee DD1 5EH, UK.

Email: [ykulathu@dundee.ac.uk](mailto:ykulathu@dundee.ac.uk), Tel: +44 1382 388163, Fax: +44 1382 223778

## Supplementary Materials and Methods

### *In vitro* deubiquitination assays.

Cezanne wild-type (Cezanne WT) and Cezanne E287K/E288K (Cezanne EK) were diluted to 0.02 mg/ml in 50 mM Tris-HCl (pH 7.5), 50 mM NaCl, and 10 mM DTT and incubated at 24 °C for 10 min. In a 30- $\mu$ l-reaction volume, 300 ng of the activated DUB was incubated with 1.5  $\mu$ g of tetraUb of different linkage types in 50 mM Tris-HCl (pH 7.5), 50 mM NaCl, and 5 mM DTT. The reaction was carried out at 30 °C and 10  $\mu$ l of sample was taken at the indicated time points and reaction stopped by addition of LDS sample buffer (Life Technology). The samples were resolved by SDS PAGE on the 4-12% gel (Life Technology) and visualized by silver staining (Thermo Scientific).

### Crystallization: data processing and structure determination

All data were processed using XDS [1] and scaled using SCALA [2]. The structures were solved by molecular replacement using the structure of ubiquitin (PDB ID: 1UBQ [3]) as search model in Phaser [4]. Iterative rounds of refinement was done using PHENIX [5] and REFMAC [6] with model building in Coot [7]. Simulated annealing and rigid body refinement was used in the initial stages to remove model bias and the structures refined to the final statistics shown in **Table 1**.

## Supplementary Figure Legends

### Figure S1 Screening of HECT E3 ligase to identify E3 that assemble Lys<sup>33</sup>-linked polyUb

(A) HECT E3 ligases were purified to near homogeneity. Purified proteins were separated in 4-12% SDS-PAGE gel and visualised by Coomassie-staining. Highlighted in boxes are the purified proteins at the calculated molecular mass. (B) Ubiquitylation assays of HECT E3 ligases in the presence of UBE1, Ub, and the optimal E2, which is shown within brackets (**Figure 1A**). 10% of the reaction was visualised on silver-stained SDS-PAGE gel, while the rest was processed for parallel reaction monitoring (pRM) (**Figure 1B**). (C) Ubiquitylation assays of HECT E3 ligases in the presence of UBE1, Ub, and the optimal E2 (B). At the indicated time point, the reaction was stopped by adding LDS sample buffer.

### Figures S2 Validation of the purified Lys<sup>33</sup>-linked diUb and triUb

(A) DUB specificity analysis for Cezanne wild-type and its E287K/E288K mutant. Samples analysed are 0.5  $\mu$ g tetraUb without DUB or after 10 or 60 min incubation with 100 ng Cezanne. DUBs are indicated with asterisks. (B) Parallel Reaction Monitoring (pRM) analysis of seven different Ub linkages in the purified Lys<sup>33</sup> diUb and Lys<sup>33</sup> triUb (Figure 2F); x-axes are retention time, y-axes are summed ion current values for the relevant daughter ions of each precursor mass analysed (**Supplementary Table 2**). In order to highlight the purity of the Lys<sup>33</sup>-linkage, the intensity scale for the non-Lys<sup>33</sup> linkages was set 10-fold lower.



### **Figures S3 Electron density quality of Lys<sup>33</sup>-linked triUb**

The electron densities between Lys<sup>33</sup> residue of one Ub moiety and the C-terminus of the symmetry-related Ub molecule when the Gly<sup>76</sup> and side chain of K<sup>33</sup> were absent (top) or present (bottom) are shown.  $2|F_o|-|F_c|$  (blue) and  $|F_o|-|F_c|$  (green) maps were contoured at  $0.71\sigma$  and  $3\sigma$ , respectively.

### **Figures S4 Structure comparison of Lys<sup>33</sup>-linked diUb and triUb with Met<sup>1</sup>-, Lys<sup>11</sup>-, and Lys<sup>48</sup>-linked diUb**

The diUb molecules were superposed on their distal Ub (grey) and the proximal Ub moieties were coloured differently. PDB 2W9N, 2XEW, 1AAR [8-10].

**Table S1: cDNA constructs**

| <b>Protein</b>         | <b>Tag</b>  | <b>Accession No</b> | <b>Construct Boundaries</b> | <b>Protein Note</b> | <b>Expression System</b> | <b>Plasmid</b> | <b>DU Number</b> |
|------------------------|-------------|---------------------|-----------------------------|---------------------|--------------------------|----------------|------------------|
| ITCH                   | GST         | Q96J02-2            | 1-862                       | full length         | bacterial                | pGEX6P         | 11097            |
| AREL1                  | GST-cleaved | Q15033              | 437-823                     | HECT domain         | bacterial                | pGEX6P         | 45348            |
| SMURF1                 | GST         | Q9HCE7              | 1-754                       | full length         | bacterial                | pGEX6P         | 19628            |
| SMURF2                 | GST         | Q9HAU4              | 1-748                       | full length         | bacterial                | pGEX6P         | 19879            |
| UBE3C                  | GST-cleaved | Q15386              | 636-1083                    | HECT domain         | bacterial                | pGEX6P         | 45902            |
| HECW1                  | GST-cleaved | Q76N89              | 1223-1606                   | HECT domain         | bacterial                | pGEX6P         | 45771            |
| HUWE1                  | GST         | Q7Z6Z7              | 3670-4374                   | HECT domain         | bacterial                | pGEXTEV        | 43501            |
| WWP1                   | GST         | Q9H0M0              | 2-921                       | full length         | bacterial                | pGEX6P         | 19746            |
| WWP2                   | GST         | Q00308              | 1-870                       | full length         | bacterial                | pGEX6P         | 19786            |
| Cezanne                | GST-cleaved | Q6GQQ9              | 124-438                     | catalytic domain    | bacterial                | pGEX6P         | 45327            |
| Cezanne<br>E287K/E288K | GST-cleaved | Q6GQQ9              | 124-438                     | catalytic domain    | bacterial                | pGEX6P         | 45353            |
| TRABID                 | GST-cleaved | Q9UGI0              | 245-697                     | catalytic domain    | bacterial                | pGEX6P         | 22468            |
| OTUB1                  | GST-cleaved | Q96FW1              | 1-271                       | full length         | bacterial                | pGEX6P         | 19741            |

**Table S2: Parameter used in the parallel Reaction Monitoring (pRM) analysis**

| Linkage | Peptide Sequence          | Charge | Retention Time | Precursor (m/z) | Daughter masses used for quantification                                                                   |
|---------|---------------------------|--------|----------------|-----------------|-----------------------------------------------------------------------------------------------------------|
| Met1    | M(gg)QIFVK                | 2+     | 8.7            | 440.34          | y <sub>3</sub> , 393.25; y <sub>4</sub> , 506.33; y <sub>5</sub> , 634.39; b <sub>7</sub> , 733.37        |
| Lys6    | MQIFVK(gg)TLTGK           | 2+     | 13.6           | 690.50          | y <sub>6</sub> , 761.45; y <sub>7</sub> , 860.50; y <sub>8</sub> , 1007.59; y <sub>9</sub> , 1120.67      |
| Lys11   | TLTGK(gg)TITLEVEPSDTIENVK | 3+     | 14.6           | 801.84          | y <sub>8</sub> , 905.46; y <sub>9</sub> , 1002.51; y <sub>10</sub> , 1131.55                              |
| Lys27   | TITLEVEPSDTIENVK(gg)AK    | 2+     | 13.9           | 1051.56         | y <sub>8</sub> , 1016.57; y <sub>11</sub> , 1315.68; y <sub>12</sub> , 1444.73; y <sub>13</sub> , 1543.79 |
| Lys29   | AK(gg)IQDK                | 2+     | 6.6            | 408.80          | b <sub>3</sub> , 427.26; y <sub>4</sub> , 503.30; b <sub>5</sub> , 670.35; y <sub>5</sub> , 745.40        |
| Lys33   | IQDK(gg)EGIPPDQQR         | 3+     | 9.3            | 546.61          | y <sub>6</sub> <sup>2+</sup> , 370.90; y <sub>6</sub> , 740.30; b <sub>7</sub> , 898.30                   |
| Lys48   | LIFAGK(gg)QLEDGR          | 2+     | 12.7           | 731.36          | y <sub>4</sub> , 476.40; y <sub>5</sub> , 589.45; y <sub>6</sub> , 717.20                                 |
| Lys63   | TLSDYNIQK(gg)ESTLHLVLR    | 2+     | 14.5           | 1122.67         | y <sub>5</sub> , 637.41; y <sub>8</sub> , 938.58; y <sub>9</sub> , 1067.62                                |

**Table S3: Summary of interactions in Lys<sup>33</sup>-linked diUb interface**

| <b>Chain</b> | <b>Residue</b>    | <b>Chain</b> | <b>Residue</b>    | <b>Type of Bond</b> |
|--------------|-------------------|--------------|-------------------|---------------------|
| B            | Leu <sup>8</sup>  | A            | Leu <sup>8</sup>  | Hydrophobic         |
| B            | Ile <sup>13</sup> | A            | Leu <sup>73</sup> | Hydrophobic         |
| B            | Ile <sup>36</sup> | A            | Pro <sup>37</sup> | Hydrophobic         |
| B            | Ile <sup>36</sup> | A            | Leu <sup>71</sup> | Hydrophobic         |
| B            | Ile <sup>36</sup> | A            | Leu <sup>73</sup> | Hydrophobic         |
| B            | Leu <sup>69</sup> | A            | Leu <sup>71</sup> | Hydrophobic         |
| B            | Leu <sup>69</sup> | A            | Leu <sup>73</sup> | Hydrophobic         |
| B            | Leu <sup>71</sup> | A            | Ile <sup>36</sup> | Hydrophobic         |
| B            | Leu <sup>71</sup> | A            | Leu <sup>69</sup> | Hydrophobic         |
| B            | Leu <sup>71</sup> | A            | Leu <sup>71</sup> | Hydrophobic         |
| B            | Leu <sup>73</sup> | A            | Ile <sup>13</sup> | Hydrophobic         |
| B            | Leu <sup>73</sup> | A            | Ile <sup>36</sup> | Hydrophobic         |
| B            | Leu <sup>73</sup> | A            | Val <sup>5</sup>  | Hydrophobic         |
| B            | Leu <sup>73</sup> | A            | Leu <sup>69</sup> | Hydrophobic         |
| B            | Gln <sup>40</sup> | A            | Glu <sup>64</sup> | Hydrogen            |
| B            | Glu <sup>64</sup> | A            | Gln <sup>40</sup> | Hydrogen            |

## Supplementary References

- 1 Kabsch, W. (2010) XDS. *Acta Crystallogr D Biol Crystallogr* **66**, 125–132.
- 2 Evans, P. (2006) Scaling and assessment of data quality. *Acta. Crystallogr. D Biol. Crystallogr.* **62**, 72–82.
- 3 Vijay-Kumar, S., Bugg, C. E. and Cook, W. J. (1987) Structure of ubiquitin refined at 1.8 Å resolution. *J. Mol. Biol.* **194**, 531–544.
- 4 McCoy, A. J., Grosse Kunstleve, R. W., Storoni, L. C. and Read, R. J. (2005) Likelihood-enhanced fast translation functions. *Acta. Crystallogr. D Biol. Crystallogr.* **61**, 458–464.
- 5 Adams, P. D., Grosse Kunstleve, R. W., Hung, L.-W., Ioerger, T. R., McCoy, A. J., Moriarty, N. W., Read, R. J., Sacchettini, J. C., Sauter, N. K. and Terwilliger, T. C. (2002) PHENIX: building new software for automated crystallographic structure determination. *Acta. Crystallogr. D Biol. Crystallogr.* **58**, 1948–1954.
- 6 Murshudov, G. N., Vagin, A. A. and Dodson, E. J. (1997) Refinement of macromolecular structures by the maximum-likelihood method. *Acta. Crystallogr. D Biol. Crystallogr.* **53**, 240–255.
- 7 Emsley, P. and Cowtan, K. (2004) Coot: model-building tools for molecular graphics. *Acta. Crystallogr. D Biol. Crystallogr.* **60**, 2126–2132.
- 8 Komander, D., Reyes-Turcu, F., Licchesi, J. D. F., Odenwaelder, P., Wilkinson, K. D. and Barford, D. (2009) Molecular discrimination of structurally equivalent Lys 63-linked and linear polyubiquitin chains. *EMBO Rep.* **10**, 466–473.
- 9 Bremm, A., Freund, S. M. V. and Komander, D. (2010) Lys11-linked ubiquitin chains adopt compact conformations and are preferentially hydrolyzed by the deubiquitinase Cezanne. *Nat. Struct. Mol. Biol.* **17**, 939–947.
- 10 Cook, W. J., Jeffrey, L. C., Carson, M., Chen, Z. and Pickart, C. M. (1992) Structure of a diubiquitin conjugate and a model for interaction with ubiquitin conjugating enzyme (E2). *J. Biol. Chem.* **267**, 16467–16471.

Supplementary Figure S1

**A**

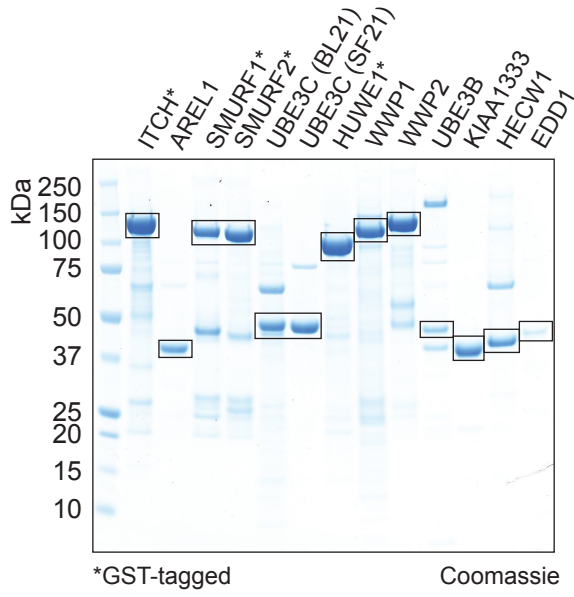

**B**

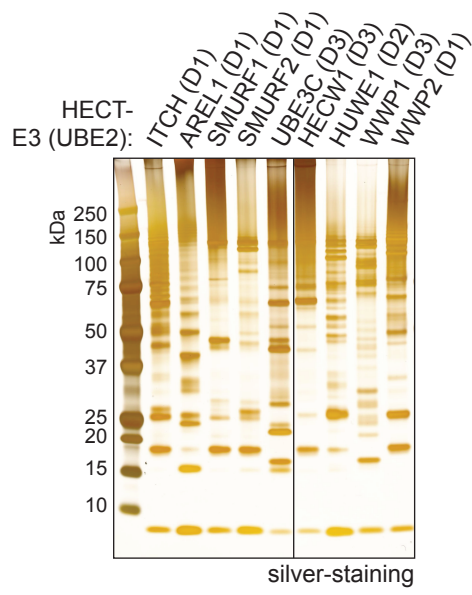

**C**

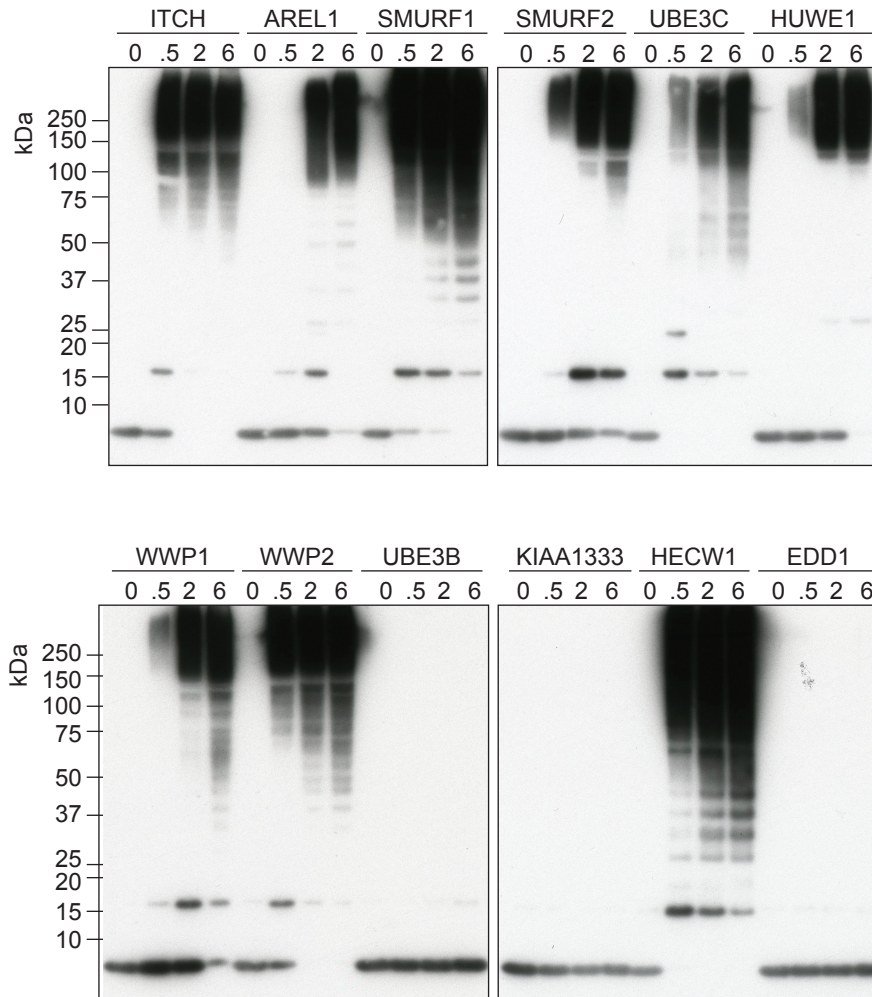

# Supplementary Figure S2

**A**

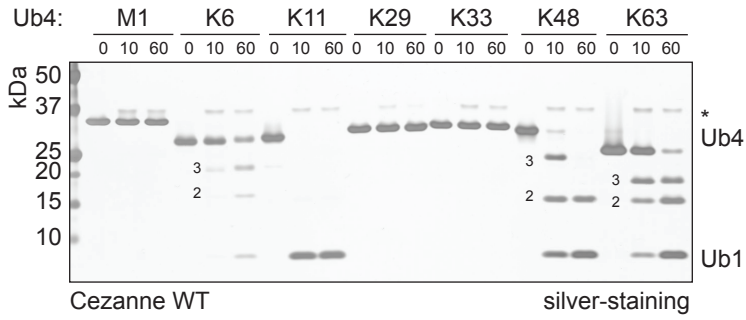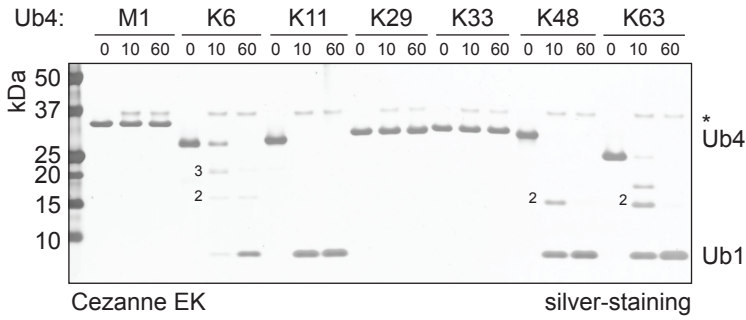

**B**

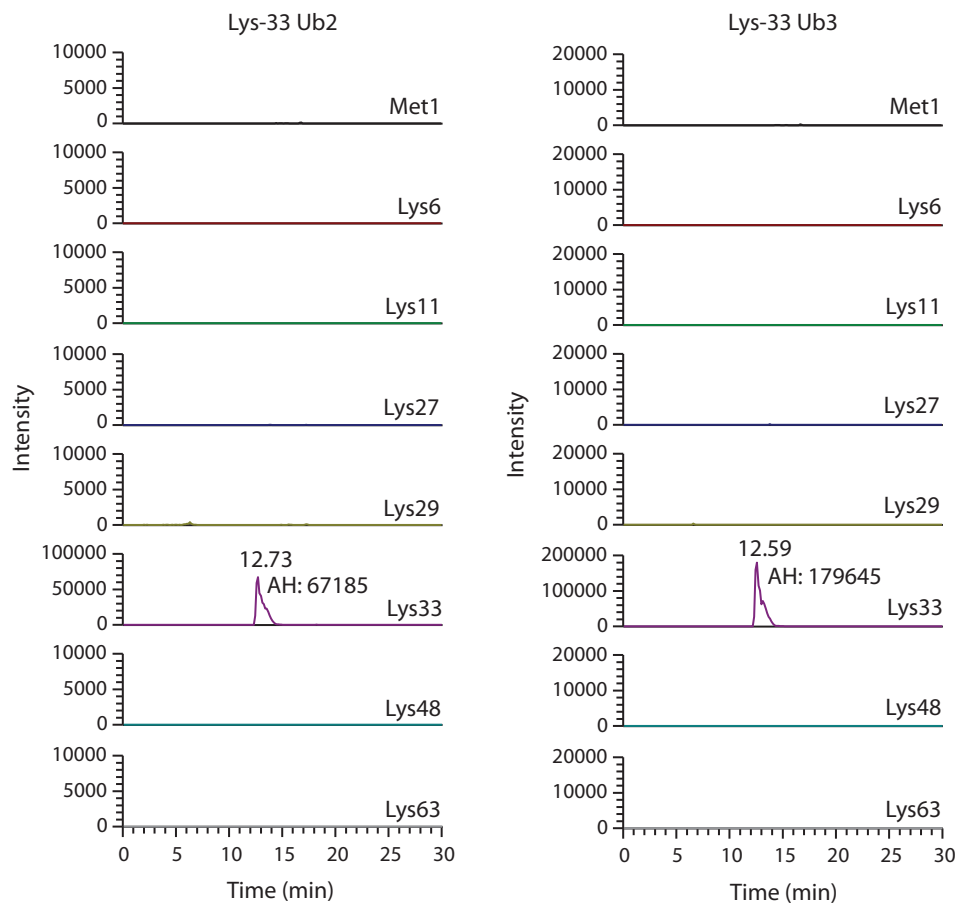

# Supplementary Figure S3

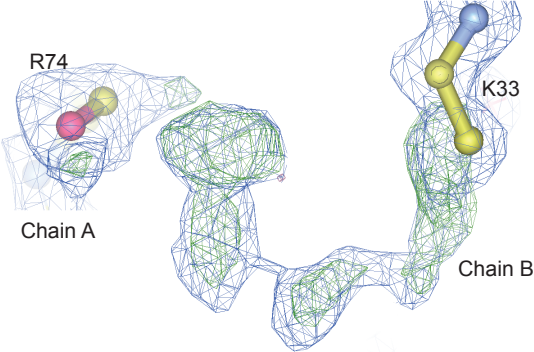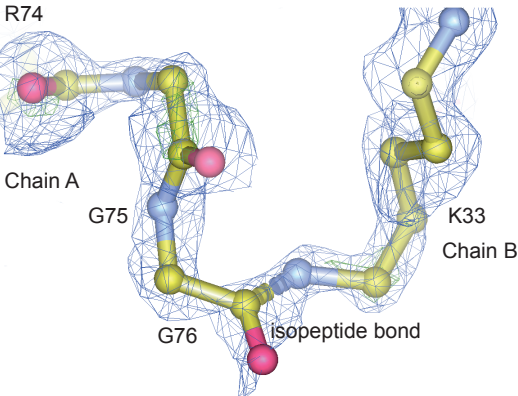



# Supplementary Figure S4

Lys-33 Ub2 and Met-1 Ub2 (2W9N)

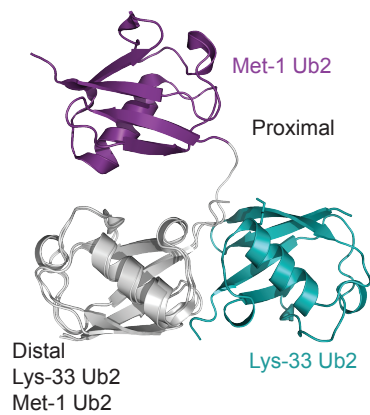

Lys-33 Ub2 and Lys-11 Ub2 (2XEW)

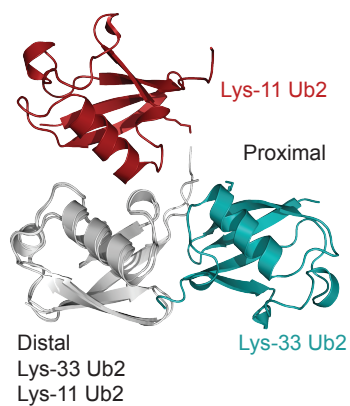

Lys-33 Ub2 and Lys-48 Ub2 (1AAR)

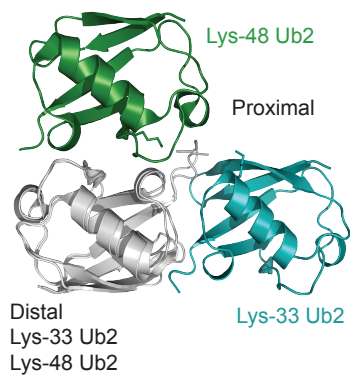

Lys-33 Ub3 and Met-1 Ub2 (2W9N)

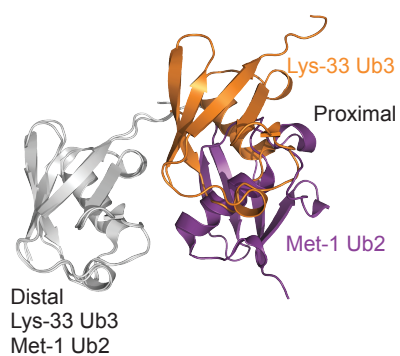

Lys-33 Ub3 and Lys-11 Ub2 (2XEW)

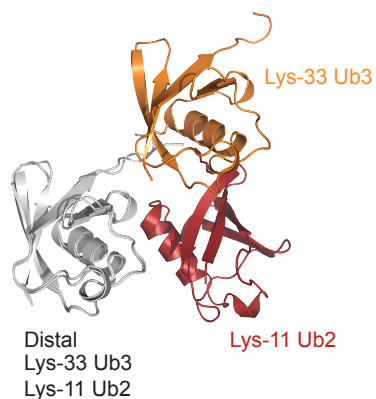

Lys-33 Ub3 and Lys-48 Ub2 (1AAR)

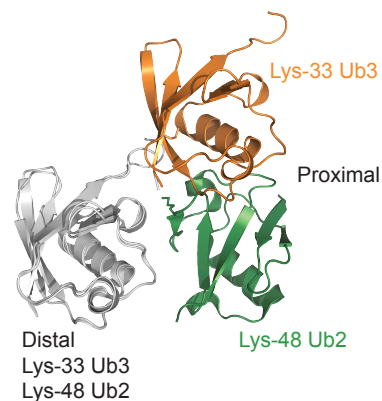

Supplement: bj4670345ntsadd.pdf [file bj4670345ntsadd.pdf]
